# Supplementary material
Source: PubMed Central journal article supplement (PMC8897958)

A

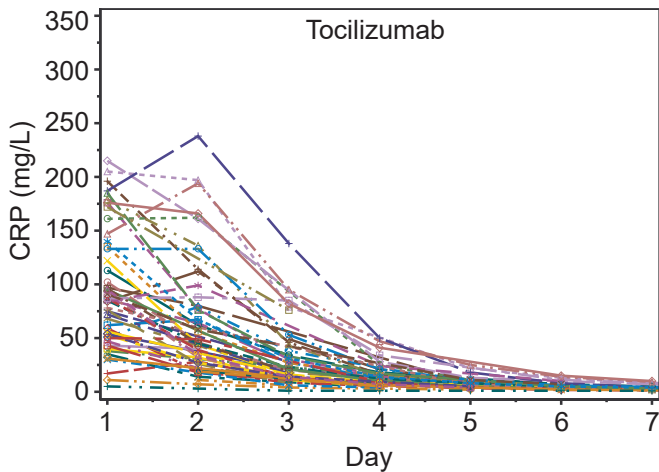

B

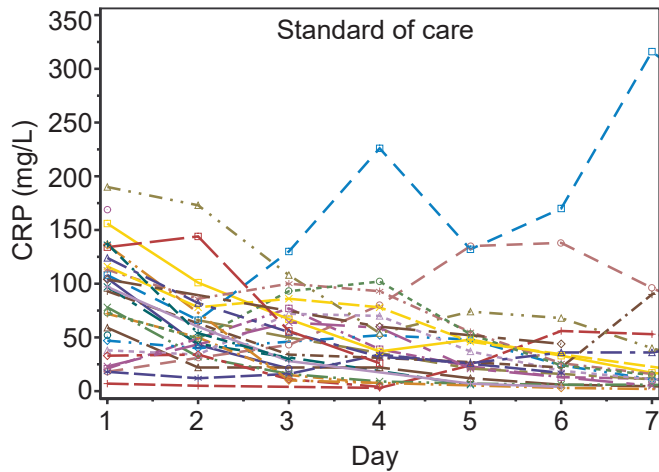

Supplement: mmc1.pdf [file mmc1.pdf]
